# Supplementary material
Source: Atypon-hosted journal article supplement (doi:10.1287/mnsc.2024.05423)
Supplement: mnsc.2024.05423.sm1.pdf [file mnsc.2024.05423.sm1.pdf]

Internet Appendix for  
Third Party Quality Certification in the Market for Financial Advice  
by William Gerken and Morteza Momeni

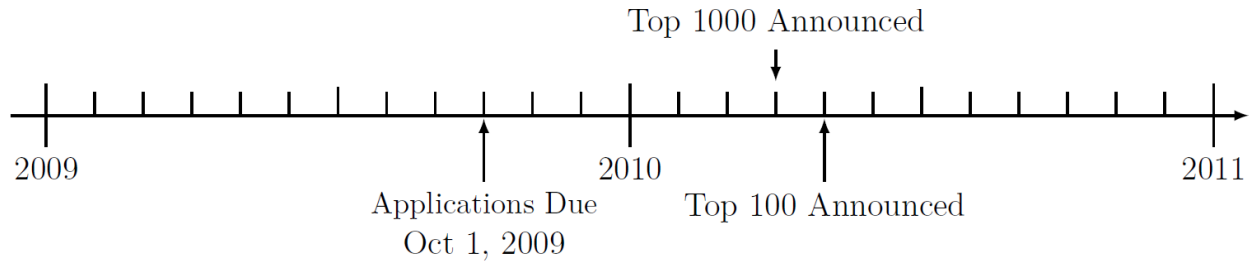

**Figure IA.1 Barron's Timeline**

This figure illustrates the timeline for the 2010 Barron's rankings. Applications for the Top 1000(1200) are due as of October 1st of the prior year. The Top 1000 advisors are announced in March of the ranking year, and the Top 100 are announced in April of the ranking year.

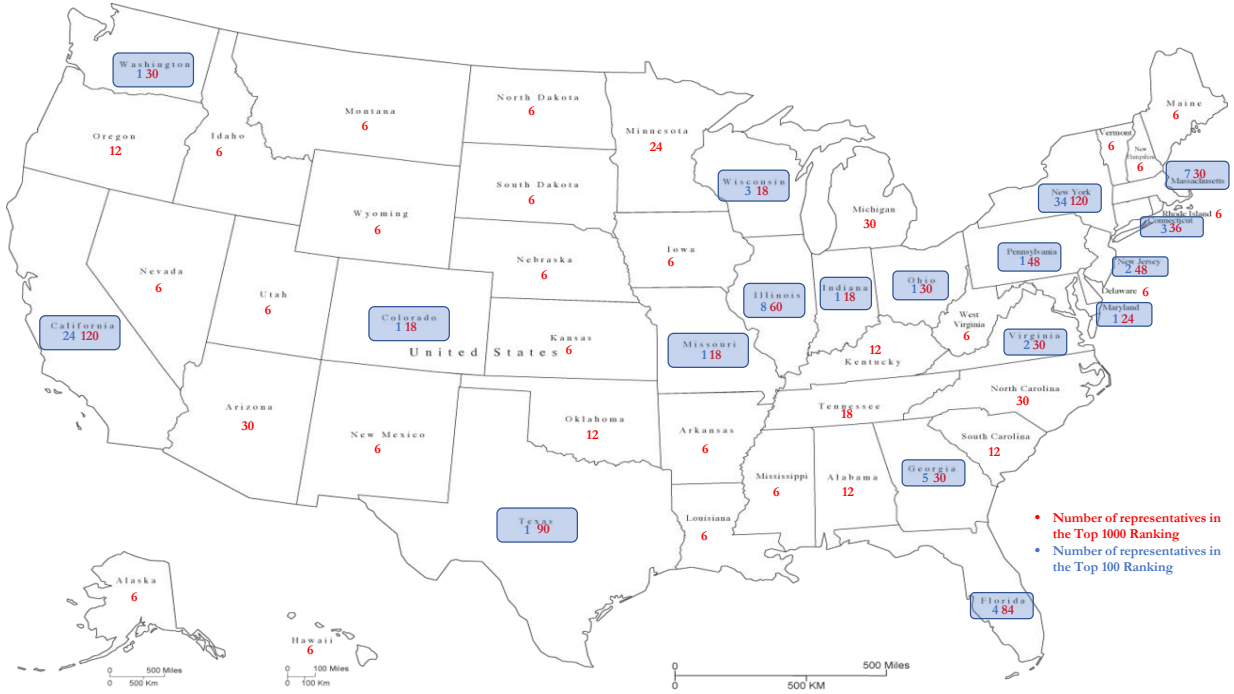

**Figure IA.2 State Level Breakdown of Top Advisors**

This figure shows the distribution of advisors across states who were ranked in Barron's Top 100 and Top 1000 (or 1200) lists in the year 2018.



**Thomas M. Moran**  
 Founder, Chief Executive Officer  
 Senior FPM Portfolio Manager

With more than 30 years' experience in financial services industry, Tom is ranked as the #1 Financial Advisor in the State of Florida in Barron's Top 100 list for years. Tom has also ranked in the top 10 of the Top 100 Advisors in the Nation.

Tom was included in the Forbes magazine 2014, 2017, 2018 and 2019 Top Wealth Advisor list and other national "Best" Top 100 Advisor list. In 2012, 2014, 2016, 2017, 2018 and 2019, which recognizes the top financial advisors of individuals across the United States.

Other industry accolades include the Top 100 Wealth Advisor as ranked by WealthManagement.com in 2018. Tom has received both the Wealth Advisor "Top Advisor" and the Wealth Edge Advisor of the Year distinction recognizing Tom's client relationship management for long performance, including the Ambassador Portfolio, which was ranked #1 by Lipper Research. He has been chosen several times for the 100 greatest wealth managers in 2014.

As a Senior FPM Portfolio Manager as well as a member of the South Advisory Council for the based money management services, Tom is well known and respected throughout the Top 100 Advisors and other national financial services industry and institutional organizations throughout the nation in the retirement and financial markets. Tom is often invited to share his insights with numerous leading industry publications, including several top industry business and financial articles as a variety of financial and investment topics for local and national industry magazines.

Tom is deeply engaged in the Naples community and is a passionate supporter of numerous organizations. He serves on the Executive Advisory Council of the United 2nd Coast and Metropolitan Children's Hospital of Naples, the Naples Medical Alliance for the James Watson Institute, and is Chairman Emeritus of the Board for Open Naples. Tom is also a member of the Naples Community Foundation, the Executive Foundation of Naples, and a member of the Naples Chamber of Commerce. In 2015 Naples Daily News ranked Tom as one of their Top 25 over 40 investors in recognition of his philanthropic efforts and achievements. In 2014, Tom was named as the best in class community advisory board, which recognizes the charitable work of financial advisors.

Additionally, Tom and his wife of 22 years, Sarah, are Trustees for the Naples Children & Education Foundation (NCEF), which supports the Naples Water Area Center. The center serves as a center of the 2014 and 2015 National Youth Center for the Naples Water Area Center. The center serves as a center of the 2014 and 2015 National Youth Center for the Naples Water Area Center. The center serves as a center of the 2014 and 2015 National Youth Center for the Naples Water Area Center.

Recognitions of both remarkable work and impact within the Naples community, Tom and Sarah received the 2011 Philanthropist of the Year's Lifetime Achievement award and in 2012 were honored by Naples Life magazine as the best and wisest of the Year and Tom was one of Naples Magazine's Best of the Year in 2017. In 2015, the United Arts Council recognized Tom and Sarah as stars in the Arts for their dedication to education in the arts for local children.

(a)

About Patrick Dwyer

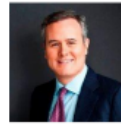

An experienced financial executive, Patrick Dwyer is a private wealth advisor at Merrill Lynch's Miami office. After receiving his master of business administration from the University of Miami, he completed the Merrill Lynch MBA Analyst Program in New York City. Patrick Dwyer subsequently returned to Miami to begin his career as a financial advisor. After several years with the firm, he accepted an offer to join a new Merrill Lynch division, the Private Banking and Investment Group, which is designed to serve the needs of ultra-high-net-worth individuals.

Today, Patrick Dwyer serves as a managing director in the firm's wealth management division and oversees Dwyer & Associates, which ranks among the top 10 Merrill Lynch advisory practices in the world. He works with a small number of affluent families, helping them to build wealth in the long term and to assemble diversified investment portfolios. Patrick has named Patrick Dwyer the number-one advisor in Florida three times and among the top 100 Financial Advisors for nine consecutive years.

(b)

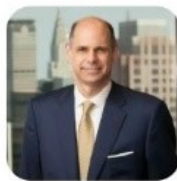

About Me

Adam E. Carlin is Managing Director and Senior Portfolio Management Director at Morgan Stanley Private Wealth Management.

From 2006 to 2009, he was selected for Research magazine's "Winner's Circle State-by-State" ranking of the top advisors in America. From 2009 through 2017 Barron's magazine named him one of the top advisors in the country and in the State of Florida. In addition, Adam has been included as a member in the inaugural listing of Forbes "Top 200 Wealth Advisors."

Adam E Carlin

Managing Director, Wealth Management, Private Wealth Advisor, Senior Portfolio Management Director

(c)

Charles H Mulfinger II

Managing Director, Wealth Management, Institutional Consulting Director, Family Wealth Director, Alternative Investments Director, Corporate Retirement Director

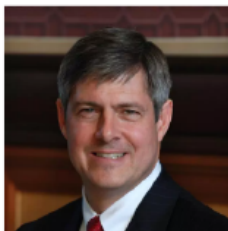

With 34 years of investment experience, Charlie leads Graystone Consulting Tampa, a team of 13 experienced professionals focused on serving the unique needs of institutions and high net worth individuals and families. He is an original member of Graystone Consulting, an elite group of over 50 Morgan Stanley consulting teams recognized for providing extraordinary investment consulting services. Throughout his career, Charlie has received specialized training in investment policy development, portfolio optimization incorporating alternative investments, and investment manager evaluation and selection.

Charlie completed an executive education course at the University of Pennsylvania's Wharton School of Business, where he received a certification as a Certified Investment Management Analyst (CIMA). For his experience and dedication to excellence, Charlie has been named to Barron's "Top 100 Advisors" list for 2018, Barron's "Top 1,200 Advisors" list from 2010 through 2018, and Forbes "Top 250 Wealth Advisors" list for 2018. In addition, Graystone Consulting Tampa was selected to PLANADVISOR'S "Top 100 Retirement Plan Advisors" list from 2013 through 2018 and was ranked 18th on Barron's "Top Institutional Consultants" list in 2018.

(d)

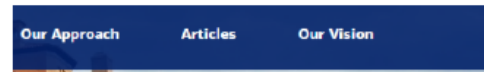

Chiavacci Group  
 Private Wealth Advisors

Louis J. Chiavacci was named to Barron's Top 1,200 Financial Advisors list in 2019. Barron's has ranked Louis among its top five advisors in Florida state.

(e)

**Figure IA.3 Websites of Florida's 2018 Barron's Ranked Advisors - Top 100 Rank [Florida Rank]**  
 (a) Thomas Moran #27 [1<sup>st</sup> in FL]; (b) Patrick Dwyer #30 [2<sup>nd</sup>]; (c) Adam Carlin #65 [3<sup>rd</sup>]; (d) Charles Mulfinger II #91 [4<sup>th</sup>]; and, (e) Louis Chiavacci Not ranked in Top 100 [5<sup>th</sup>]

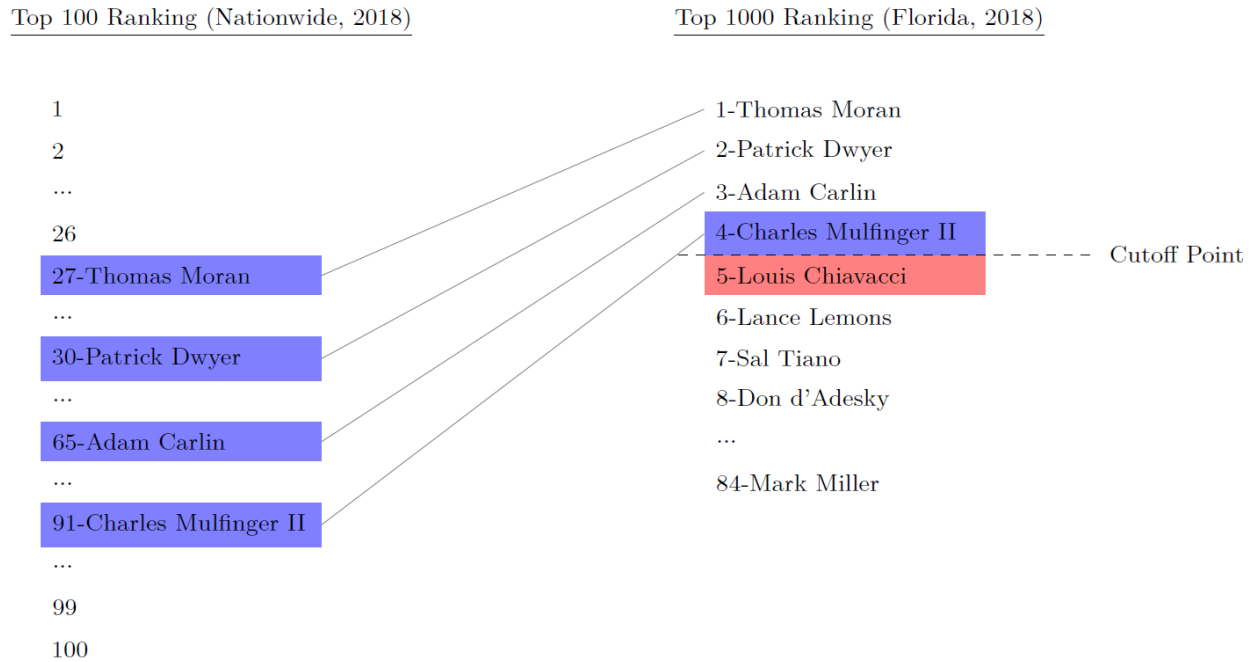

**Figure IA.4 State-Level Cutoff Example - Florida 2018**

This figure illustrates the state-level cutoff from the 2018 Barron's rankings in Florida. In the main analysis, the advisor who narrowly qualifies for the list (Charles Mulfinger II) is classified as treated, while the advisor who narrowly misses the cutoff (Louis Chivacci) serves as the control.

| Top 1000 Ranking | Score  | State    | State 1          |       | State 2          |       | ... | State 49         |       | State 50         |       | State 51         |       |
|------------------|--------|----------|------------------|-------|------------------|-------|-----|------------------|-------|------------------|-------|------------------|-------|
|                  |        |          | Top 1000 Ranking | Score | Top 1000 Ranking | Score | ... | Top 1000 Ranking | Score | Top 1000 Ranking | Score | Top 1000 Ranking | Score |
| 1                | 100.00 | State 48 |                  |       |                  |       | ... |                  |       |                  |       |                  |       |
| 2                | 99.90  | State 23 | 3                | 99.8  | 16               | 98.65 | ... | 190              | 82.32 | 58               | 94.54 | 11               | 99.05 |
| 3                | 99.80  | State 1  | 24               | 98    | 46               | 95.44 | ... | 303              | 71.01 | 168              | 84.18 | 14               | 98.74 |
| 4                | 99.75  | State 13 | 48               | 95.18 | 85               | 92.03 | ... | 313              | 70.16 | 216              | 79.53 | 19               | 98.43 |
| 5                | 99.66  | State 28 | 69               | 93.53 | 99               | 90.96 | ... | 347              | 66.84 | 218              | 79.44 | 28               | 97.69 |
| 6                | 99.61  | State 11 | 77               | 92.99 | 193              | 82.09 | ... | 405              | 60.61 | 335              | 68.39 | 68               | 93.58 |
| 7                | 99.42  | State 29 | 91               | 91.6  | 267              | 74.24 | ... | 488              | 52.7  | 368              | 64.2  | 102              | 90.52 |
| 8                | 99.36  | State 13 | 121              | 88.79 | 273              | 73.91 | ... | 615              | 39.22 | 394              | 62.11 | 139              | 87.04 |
| 9                | 99.10  | State 42 | 126              | 88.26 | 274              | 73.81 | ... | 621              | 38.68 | 418              | 58.79 | 152              | 85.39 |
| 10               | 99.08  | State 30 | 144              | 86.51 | 366              | 64.34 | ... | 626              | 38.45 | 534              | 48.13 | 156              | 85.25 |
| 11               | 99.05  | State 51 | 148              | 86.23 | 416              | 59.33 | ... | 753              | 27.63 | 610              | 39.77 | 223              | 79.2  |
| 12               | 99.01  | State 28 | 189              | 82.41 | 441              | 56.4  | ... | 836              | 18.97 | 678              | 34.65 | 238              | 77.85 |
| 13               | 98.82  | State 39 | 233              | 78.04 | 454              | 54.93 | ... | 855              | 16.62 | 756              | 27.24 | 294              | 71.8  |
| 14               | 98.74  | State 51 | 244              | 77.15 | 467              | 54.28 | ... | 905              | 11.13 | 800              | 23.12 | 308              | 70.67 |
| 15               | 98.65  | State 40 | 268              | 74.19 | 555              | 45.03 | ... | 979              | 2.47  | 856              | 16.43 | 311              | 70.52 |
| ...              | ...    | ...      | 296              | 71.42 | 654              | 36.57 | ... |                  |       | 923              | 9.11  | 331              | 68.5  |
| ...              | ...    | ...      | 337              | 68.12 | 660              | 36.35 | ... |                  |       | 969              | 3.32  | 393              | 62.24 |
| 995              | 1.05   | State 50 | 370              | 64.15 | 724              | 30.14 | ... |                  |       | 995              | 1.05  | 413              | 59.71 |
| 996              | 1.01   | State 3  | 754              | 27.57 | 758              | 27.17 | ... |                  |       |                  |       | 450              | 55.33 |
| 997              | 0.95   | State 33 | 771              | 25.85 | 767              | 26.57 | ... |                  |       |                  |       | 535              | 48.06 |
| 998              | 0.93   | State 41 | 818              | 20.83 | 865              | 14.85 | ... |                  |       |                  |       | 742              | 28.83 |
| 999              | 0.89   | State 30 | 820              | 20.49 | 968              | 3.4   | ... |                  |       |                  |       | 773              | 25.52 |
| 1000             | 0.30   | State 19 | 974              | 2.88  | 975              | 2.86  | ... |                  |       |                  |       | 804              | 22.67 |
|                  |        |          |                  |       | 978              | 2.47  | ... |                  |       |                  |       | 846              | 17.96 |
|                  |        |          |                  |       |                  |       |     |                  |       |                  |       | 890              | 12.28 |

**Figure IA.5 Hypothetical Example of Treatment Assignment Based on State-Level Cutoffs**

This figure presents a hypothetical example illustrating our identification strategy. Red lines denote state-level cutoff thresholds. Dark blue cells represent advisors just above the cutoff (treated), while light orange cells represent those just below (control). The variable *Score* is a continuous measure used to rank advisors in Barron's Top 1000 (or 1200) Rankings.

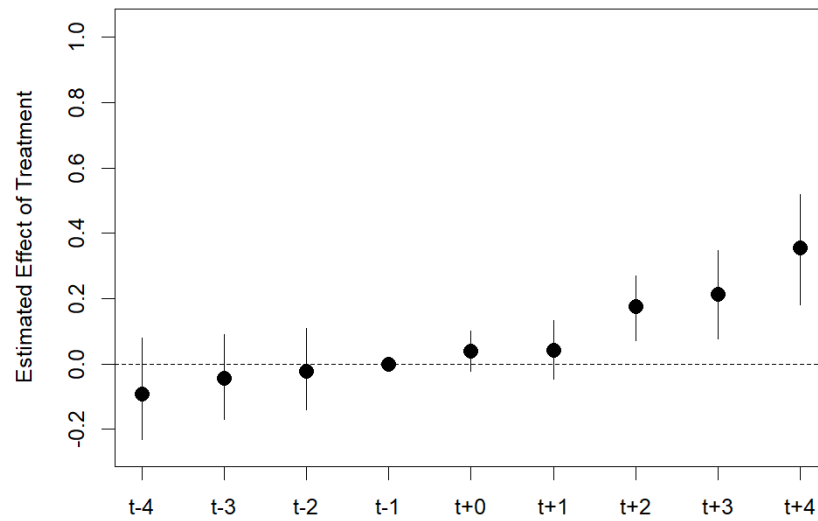

**Figure IA.6 Matching Estimates in Event Time - Firm Level**

$$Y_{i,t} = \alpha + \sum_{\tau=-4}^4 \Gamma_{\tau} \cdot \text{Top Advisor Owner}_i \cdot D_{t,\tau} + \delta_l + \delta_{v,t} + \delta_{s,t} + \delta_{w,t} + \delta_{c,t} + \varepsilon_{i,t},$$

This figure presents the average treatment effects estimated using the difference-in-differences estimator within the PanelMatch method (Imai et al. (2023)). It reports the effects on the logarithm of the number of accounts. The Y-axis displays the estimated treatment effects, and the X-axis shows the event time, where zero denotes the year of treatment. Treated firms are matched to control firms based on pre-treatment characteristics, including past misconduct, lagged log(number of employees), lagged log(AUM), and lagged log(number of accounts).

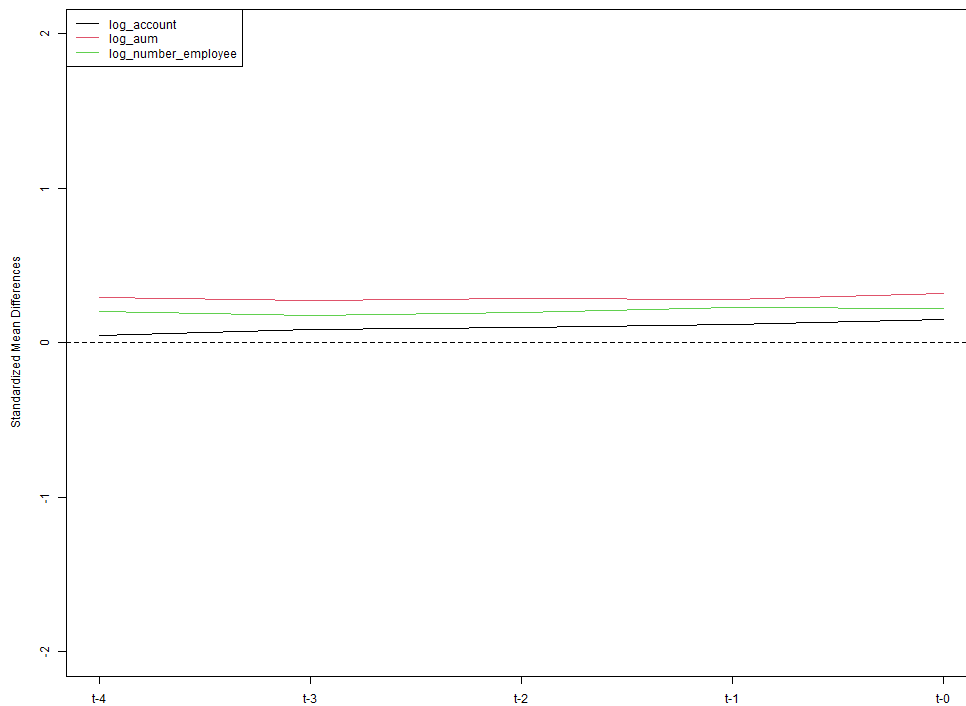

**Figure IA.7 Covariate Balance - Firm Level**

This figure presents the standardized mean differences for three key covariates— $\log(AUM)$ ,  $\log(Accounts)$ , and  $\log(number\ of\ employees)$ —during the pre-treatment period (from  $t - 4$  to  $t - 0$ ). The standardized mean difference quantifies the distance between treated and control group means for each covariate, expressed in standard deviation units. Smaller absolute values indicate better covariate balance and suggest that the matching procedure has successfully reduced observable differences between treated and control units prior to treatment (Imai et al. (2023)).

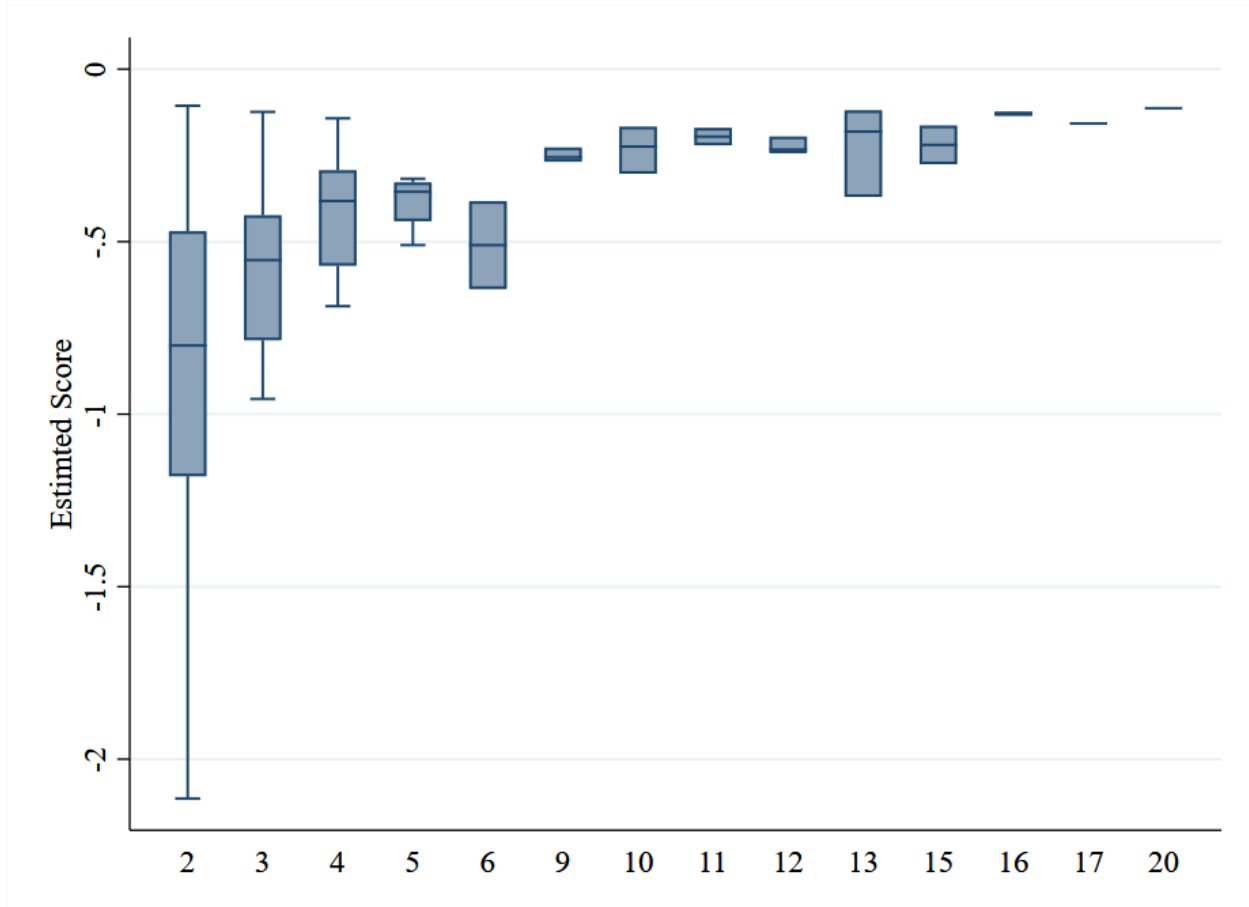

**Figure IA.8 Estimated Effect of Rank Improvements within the Top 1000 on Advisor-Level Continuous Scores**

This figure displays a box-and-whisker plot of the estimated advisor scores, obtained from separate state-year level regressions of *Score* on the advisor's numerical rank. The analysis is restricted to advisors ranked between 50 and 100 in a given year in Barron's Top 100 ranking. Each regression is run independently for each state-year combination. The X-axis indicates the number of advisors included in each state-year regression, while the Y-axis reports the estimated continuous scores.

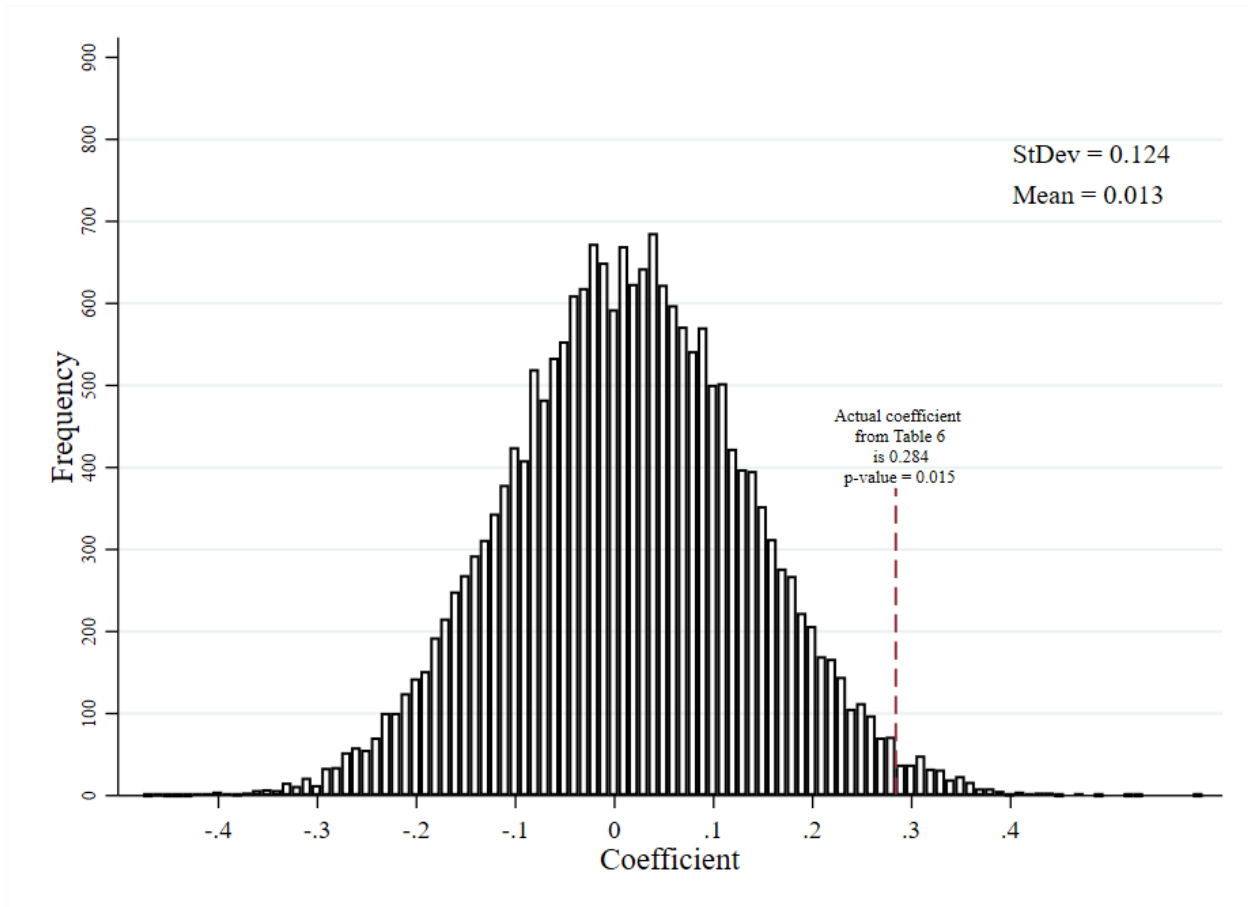

**Figure IA.9 Placebo Threshold Test for AUM Among Top 1000 Advisors**

This figure presents a histogram of the estimated coefficients on the *Pseudo Top 100* indicator based on 20,000 placebo iterations. Each iteration replicates the specification from Table 4, Panel B, Column (1), but with randomly assigned cutoff thresholds. Specifically, after removing actual Top 100 advisors from the Top 1000 sample, we randomly assign a cutoff point within each state that originally had at least one Top 100 advisor. All other advisor characteristics are held constant. We then re-estimate the model to assess the distribution of placebo effects.

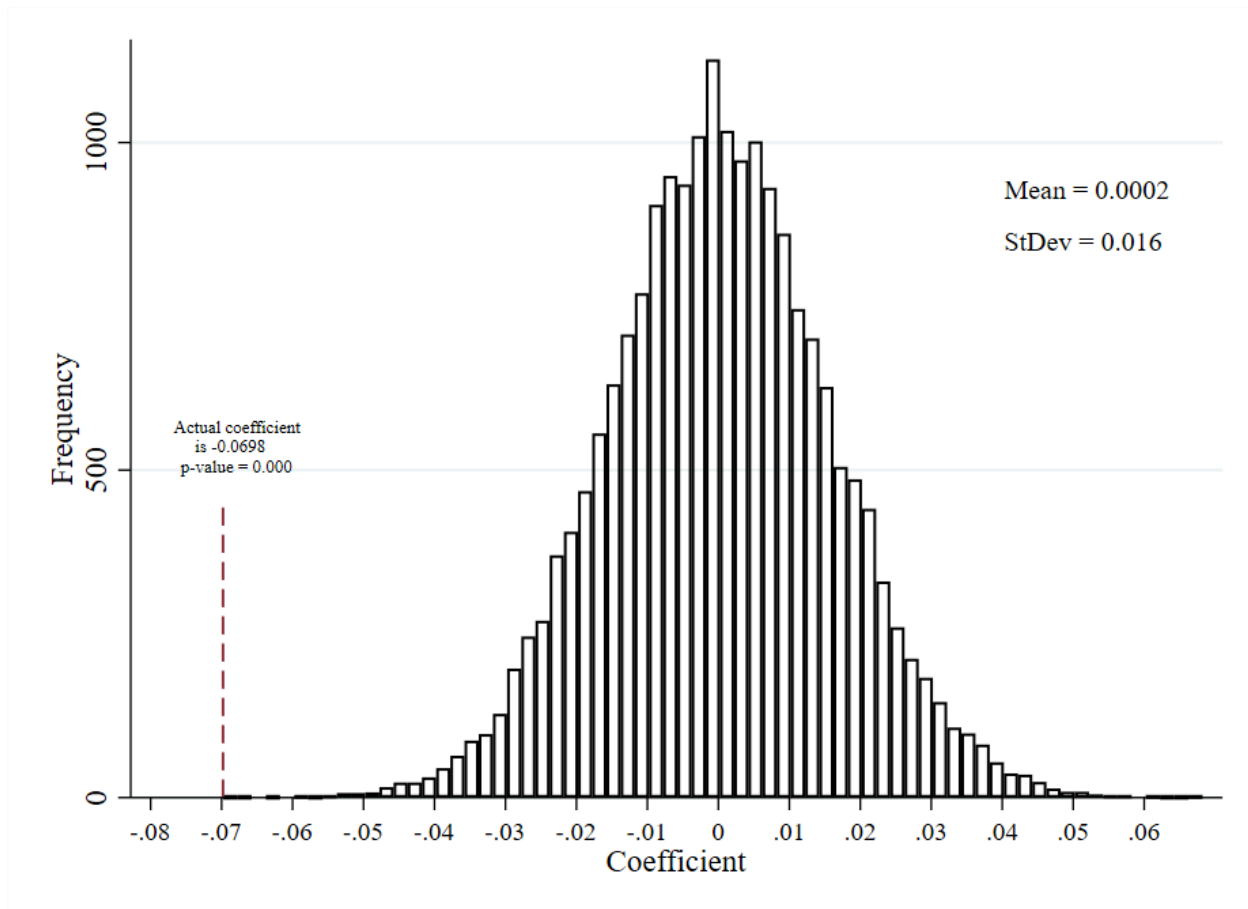

**Figure IA.10 Placebo Threshold Test for Misconduct Among Top 1000 Advisors**

This figure presents a histogram of the estimated coefficients on the *Pseudo Top 100* indicator based on 20,000 placebo iterations. Each iteration replicates the specification from Table 5, Column (6), but with randomly assigned cutoff thresholds. Specifically, after removing actual Top 100 advisors from the Top 1000 sample, we randomly assign a cutoff point within each state that originally had at least one Top 100 advisor. All other advisor characteristics are held constant. We then re-estimate the model to assess the distribution of placebo effects.

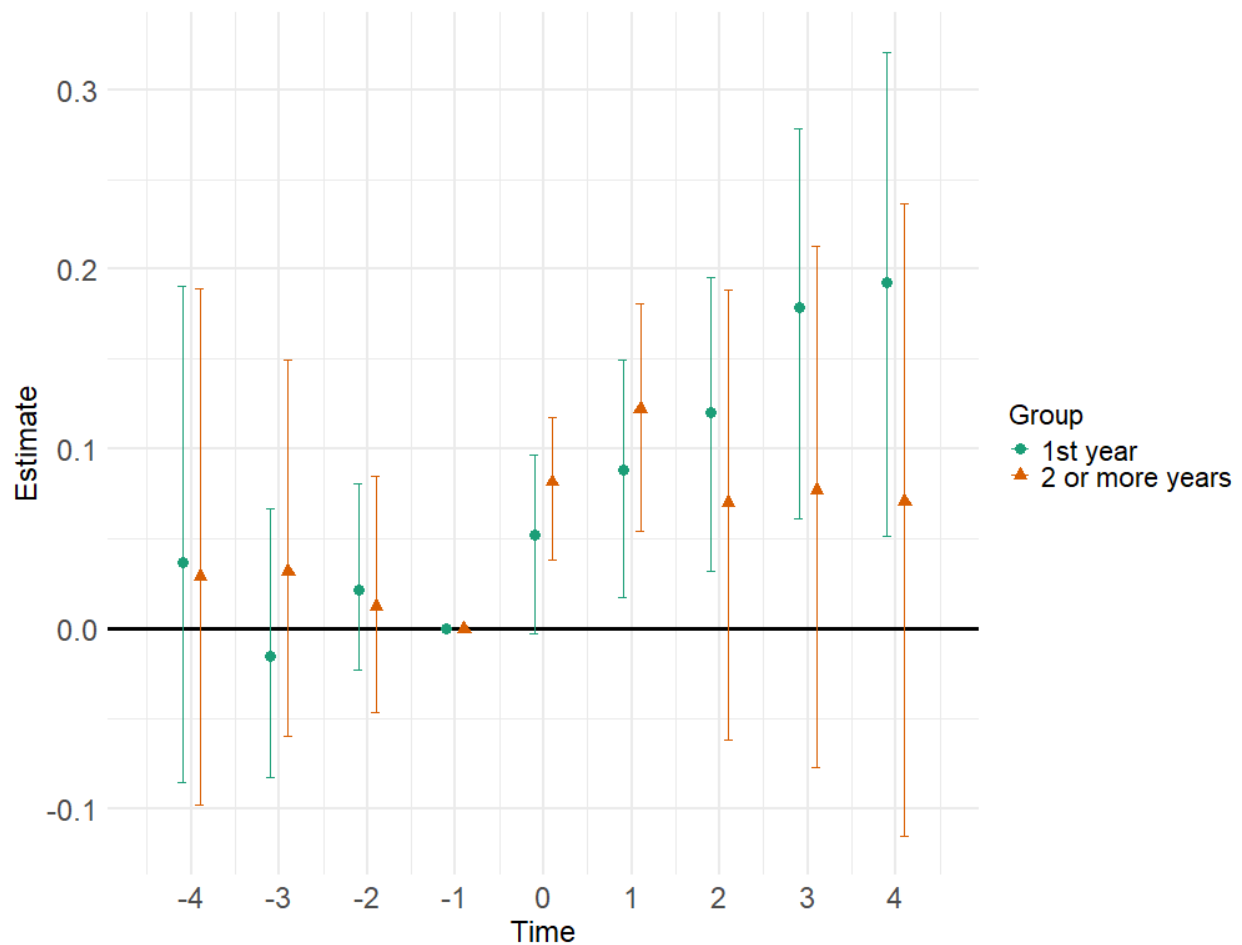

**Figure IA.11 AUM Firm-level by Certification Cohort**

This figure displays the average treatment effects estimated using a difference-in-differences framework for two distinct subsamples: (1) advisors who appear in Barron's Top 100 ranking for the first time, and (2) advisors who remain in the ranking for two or more consecutive years. The outcome variable is the logarithm of asset under management (AUM). The Y-axis reports the estimated treatment effects, while the X-axis denotes event time, centered around the initial year of ranking. Treated advisors are matched to control advisors based on pre-treatment characteristics, including past misconduct, lagged log(number of employees), lagged log(AUM), and lagged log(number of accounts).

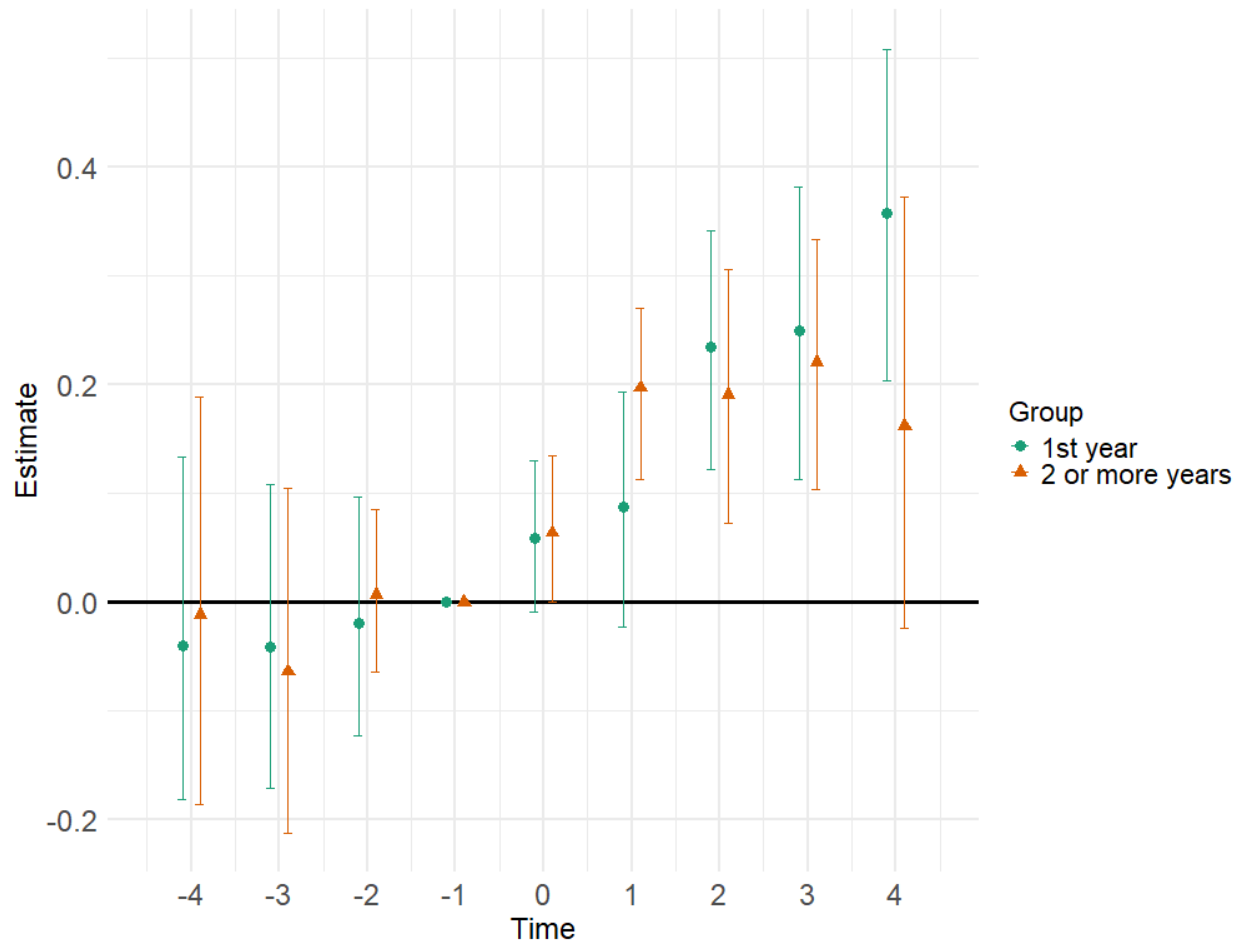

**Figure IA.12 Account Firm-level by Certification Cohort**

This figure displays the average treatment effects estimated using a difference-in-differences framework for two distinct subsamples: (1) advisors who appear in Barron's Top 100 ranking for the first time, and (2) advisors who remain in the ranking for two or more consecutive years. The outcome variable is the logarithm of the number of accounts. The Y-axis reports the estimated treatment effects, while the X-axis denotes event time, centered around the initial year of ranking. Treated advisors are matched to control advisors based on pre-treatment characteristics, including past misconduct, lagged log(number of employees), lagged log(AUM), and lagged log(number of accounts).

Table IA.1 Variable Definitions

| Variable                                    | Description                                                                                                                                                                    | Source                |
|---------------------------------------------|--------------------------------------------------------------------------------------------------------------------------------------------------------------------------------|-----------------------|
| AUM (advisor-level)                         | Advisor's self-reported assets under management.                                                                                                                               | Barron's              |
| AUM (firm-level)                            | Firm-level assets under management reported to the SEC through Form ADV.                                                                                                       | SEC filings           |
| Barron's Media Coverage (advisor-level)     | The number of Barron's related articles in a given year for an advisor.                                                                                                        | LexisNexis            |
| Client Type (advisor-level)                 | The type of clients an advisor serves: Individuals (<\$1M), High Net Worth (\$1–10M), Ultra-High Net Worth (>\$10M), Foundations, Corporations, Endowments, and Institutional. | Barron's              |
| Experience (advisor-level)                  | Advisor's years of experience.                                                                                                                                                 | Barron's              |
| Misconduct (advisor-level)                  | Indicator variable equal to 1 if an advisor committed misconduct in a given year, and 0 otherwise.                                                                             | SEC filings and FINRA |
| Misconduct (firm-level)                     | Indicator variable equal to 1 if at least one advisor in a firm committed misconduct in a given year, and 0 otherwise.                                                         | SEC filings and FINRA |
| Normalized Ranking                          | Continuous measure of advisor quality normalized at the state level using the formula: $(\text{Rank} - \min(\text{Rank})) / (\max(\text{Rank}) - \min(\text{Rank})) + 1$ .     | Barron's              |
| Non-Barron's Media Coverage (advisor-level) | The number of non-Barron's related articles in a given year for an advisor.                                                                                                    | LexisNexis            |
| Number of Accounts (advisor-level)          | Advisor's self-reported number of accounts.                                                                                                                                    | Barron's              |
| Number of Accounts (firm-level)             | Firm-level number of accounts reported to the SEC through Form ADV.                                                                                                            | SEC filings           |
| Number of Employees (firm-level)            | Firm-level number of employees reported to the SEC through Form ADV.                                                                                                           | SEC filings           |
| Series 24                                   | Indicator variable equal to 1 if the advisor holds a Series 24 license (General Securities Principal).                                                                         | FINRA                 |
| Series 26                                   | Indicator variable equal to 1 if the advisor holds a Series 26 license (Investment Company/Variable Contracts Products Principal).                                             | FINRA                 |
| Series 6                                    | Indicator variable equal to 1 if the advisor holds a Series 6 license (Investment Company/Variable Contracts Products Representative).                                         | FINRA                 |
| Series 63                                   | Indicator variable equal to 1 if the advisor holds a Series 63 license (Uniform Securities Agent State Law).                                                                   | FINRA                 |
| Series 66                                   | Indicator variable equal to 1 if the advisor holds a Series 66 license (Uniform Combined State Law).                                                                           | FINRA                 |
| Series 7                                    | Indicator variable equal to 1 if the advisor holds a Series 7 license (General Securities Representative).                                                                     | FINRA                 |
| Top 100                                     | Indicator variable equal to 1 if an advisor is ranked among Barron's Top 100 advisors at time $t$ .                                                                            | Barron's              |
| Top 1000 Owner                              | Indicator variable equal to 1 if the firm's owner appears in Barron's Top 1000 Rankings.                                                                                       | Barron's              |

This table provides definitions for all key variables used in our analyses. The variables are drawn from a combination of public regulatory filings, third-party rankings, and media databases. Firm-level information—such as assets under management (AUM), number of accounts, and employee counts—is obtained from the U.S. Securities and Exchange Commission (SEC) through mandatory Form ADV disclosures. Advisor-level data—including AUM, client composition, experience, and ranking—is sourced from Barron's, a leading financial publication that annually ranks top financial advisors based on proprietary metrics. Information on regulatory licenses (e.g., Series 6, 7, 24) and misconduct records is collected from the Financial Industry Regulatory Authority (FINRA) and SEC enforcement data. Media coverage variables are constructed using article counts from LexisNexis, distinguishing between Barron's and non-Barron's press.

Table IA.2 Firm- and Individual-Level Regressions

| <b>Panel A: Firm-Level</b>       |                      |                      |                       |                      |                     |                    |
|----------------------------------|----------------------|----------------------|-----------------------|----------------------|---------------------|--------------------|
|                                  | (1)                  | (2)                  | (3)                   | (4)                  |                     |                    |
|                                  | Log(Accounts)        | Log(Accounts)        | Log(Accounts)         | Accounts             |                     |                    |
| Top Advisor Owner                | 1.933***<br>(0.1106) | 0.106**<br>(0.0457)  | 0.0883**<br>(0.0372)  | 0.0707<br>(0.0451)   |                     |                    |
| Lagged Top Advisor Owner         |                      |                      | 0.0332<br>(0.0378)    |                      |                     |                    |
| Firm FE                          |                      | Yes                  | Yes                   | Yes                  |                     |                    |
| State × Year FE                  | Yes                  | Yes                  | Yes                   | Yes                  |                     |                    |
| $R^2$ or Pseudo $R^2$            | 0.132                | 0.960                | 0.966                 | 0.966                |                     |                    |
| Observations                     | 95,234               | 92,911               | 75,411                | 92,911               |                     |                    |
| <b>Panel B: Individual-Level</b> |                      |                      |                       |                      |                     |                    |
|                                  | (1)                  | (2)                  | (3)                   | (4)                  | (5)                 | (6)                |
|                                  | Log(Accounts)        | Log(Accounts)        | Log(Accounts)         | Log(Accounts)        | Log(Accounts)       | Accounts           |
| Top 100 Indicator                |                      |                      | 0.112***<br>(0.0359)  | 0.0847**<br>(0.0374) | 0.0518<br>(0.0503)  | 0.1289<br>(0.1166) |
| Lagged Top 100 Indicator         |                      |                      |                       |                      | 0.0521*<br>(0.0266) |                    |
| Normalized Rank                  | 0.321***<br>(0.1087) | 0.102***<br>(0.0346) | 0.0909***<br>(0.0340) | 0.0841**<br>(0.0418) | 0.0821<br>(0.0575)  | 0.0835<br>(0.0556) |
| Controls                         |                      | Yes                  | Yes                   | Yes                  | Yes                 | Yes                |
| Advisor FE                       |                      | Yes                  | Yes                   | Yes                  | Yes                 | Yes                |
| Firm FE                          |                      |                      |                       | Yes                  | Yes                 | Yes                |
| State × Year FE                  |                      |                      |                       | Yes                  | Yes                 | Yes                |
| $R^2$ or Pseudo $R^2$            | 0.008                | 0.893                | 0.893                 | 0.906                | 0.919               | 0.905              |
| Observations                     | 9,888                | 9,082                | 9,082                 | 9,068                | 7,026               | 9,068              |

This table reports regression results for the panel of financial advisory firms and individual financial advisors. In Panel A, the sample includes all firms with regulatory assets under management (AUM) of at least \$100 million and 50 or fewer employees. The unit of observation is the firm-year, and the sample spans the period 2009–2020. In Panel B, the sample includes individual financial advisors from 2009 to 2020, with the unit of observation at the advisor-year level. The dependent variable is the logarithm of one plus the number of accounts at year  $t + 1$  as the dependent variable. In Panel A, the key independent variable, *Top Advisor Owner*, is a binary indicator equal to one if the firm's owner is listed in Barron's Top 1000 Ranking at time  $t$ , and zero otherwise. Column (4) presents results estimated using Poisson maximum likelihood (ML), where the dependent variable is the number of accounts. In Panel B, *Top 100 Indicator* is a binary variable equal to one if an advisor appears in Barron's Top 100 Ranking in year  $t$ , and zero otherwise. *Normalized Rank* is a continuous variable scaled between zero and one, reflecting an advisor's relative ranking within their state. All regressions control for advisor experience and exams (Series 6, 7, 24, 65, and 66). Column 6 reports estimates obtained using Poisson maximum likelihood to account for the skewed distribution of the dependent variable. Column (6) presents results estimated using Poisson maximum likelihood (ML), where the dependent variable is the number of accounts. Robust standard errors clustered at the firm level are reported in parentheses. \*\*\*, \*\*, and \* denote statistical significance at the 1%, 5%, and 10% levels, respectively.

**Table IA.3 Certification Value Channel**

|                          | Small Firms         | Young Advisors       |
|--------------------------|---------------------|----------------------|
|                          | (1)                 | (2)                  |
|                          | Log(Accounts)       | Log(Accounts)        |
| Top 100 Indicator        | 0.0519<br>(0.0439)  | 0.0498<br>(0.0528)   |
| Top 100 × Small Firm     | 0.0904*<br>(0.0454) |                      |
| Young Advisors           |                     | -0.0325<br>(0.0839)  |
| Top 100 × Young Advisors |                     | 0.0771<br>(0.0763)   |
| Normalized Rank          | 0.0994*<br>(0.0542) | 0.0834**<br>(0.0417) |
| Controls                 | Yes                 | Yes                  |
| Advisor FE               | Yes                 | Yes                  |
| Firm FE                  | Yes                 | Yes                  |
| State × Year FE          | Yes                 | Yes                  |
| $R^2$                    | 0.916               | 0.915                |
| Observations             | 7,913               | 9,068                |

This table examines whether the effect of being named to Barron's Top 100 ranking varies by firm size and advisor experience. Column (1) presents specifications interacting the *Top 100 Indicator* with a dummy variable for advisors affiliated with single-advisor firms. Column (2) interacts the *Top 100 Indicator* with a dummy for advisors in the bottom quartile of the experience distribution. *Top 100 Indicator* equals 1 if the advisor appears in Barron's Top 100 ranking in a given year. *Normalized Rank* is a continuous, state-level measure of advisor quality. All specifications control for Series 6, 7, 24, 65, and 66 licenses; experience is included in all columns except Column (1). Standard errors are clustered at the firm level. \*\*\*, \*\*, and \* indicate statistical significance at the 1%, 5%, and 10% levels, respectively.

Table IA.4 Visibility Enhancement Channel)

| Dependent Variable — Log(Accounts) | (1)                  | (2)                  |
|------------------------------------|----------------------|----------------------|
|                                    | Without Media        | With Media           |
| Top 100 Indicator                  | 0.0847**<br>(0.0374) | 0.0847**<br>(0.0372) |
| Normalized Rank                    | 0.0841**<br>(0.0418) | 0.0833**<br>(0.0417) |
| Ln(Media Coverage)                 |                      | 0.0136<br>(0.0123)   |
| Coefficient Change (%)             | .                    | -0.04                |
| Bound ( $\delta=1$ )               | .                    | 0.383                |
| Controls                           | Yes                  | Yes                  |
| Advisor FE                         | Yes                  | Yes                  |
| Firm FE                            | Yes                  | Yes                  |
| State $\times$ Year FE             | Yes                  | Yes                  |
| $R^2$                              | 0.906                | 0.906                |
| Observations                       | 9,068                | 9,068                |

This table investigates the role of media visibility as a potential channel through which inclusion in *Barron's* Top 100 ranking affects advisor outcomes. It presents regressions where the dependent variable is the logarithm of one plus the number of accounts. These specifications are estimated both with and without controlling for media coverage to assess its mediating role. *Top 100 Indicator* is a binary variable equal to one if the advisor is listed in *Barron's* Top 100 ranking in year  $t$ . All regressions include controls for advisor experience and indicator variables for whether the advisor holds Series 6, 7, 24, 65, and 66 licenses. Standard errors are clustered at the firm level and reported in parentheses. \*\*\*, \*\*, and \* denote statistical significance at the 1%, 5%, and 10% levels, respectively.

Table IA.5: Predictive Power of Observable Characteristics

| <b>Panel A: Top 100 Indicator as Outcome Variable</b> |                      |                      |                      |                      |                        |                        |                       |
|-------------------------------------------------------|----------------------|----------------------|----------------------|----------------------|------------------------|------------------------|-----------------------|
|                                                       | (1)                  | (2)                  | (3)                  | (4)                  | (5)                    | (6)                    | (7)                   |
|                                                       | Top 100                | Top 100                | Top 100               |
| Log(Lagged AUM)                                       | 0.144***<br>(0.0184) | 0.160***<br>(0.0199) | 0.159***<br>(0.0197) | 0.166***<br>(0.0199) | 0.168***<br>(0.0193)   | 0.0669***<br>(0.0084)  | 0.0733***<br>(0.0071) |
| Lagged Misconduct                                     |                      | 0.112***<br>(0.0247) | 0.113***<br>(0.0243) | 0.109***<br>(0.0243) | 0.110***<br>(0.0248)   | 0.0268**<br>(0.0117)   | 0.00598<br>(0.0100)   |
| Log(Barron's Media)                                   |                      |                      | 0.0650**<br>(0.0311) | 0.0760**<br>(0.0311) | 0.0881***<br>(0.0329)  | 0.00960<br>(0.0117)    | 0.0158*<br>(0.0084)   |
| Log(Non-Barron's Media)                               |                      |                      | 0.0153<br>(0.0248)   | 0.0186<br>(0.0247)   | 0.0328<br>(0.0243)     | -0.00340<br>(0.0082)   | -0.00185<br>(0.0084)  |
| Lagged Series 24                                      |                      |                      |                      | 0.0292<br>(0.0200)   | 0.0354<br>(0.0237)     | -0.0228***<br>(0.0029) | -0.0314<br>(0.0225)   |
| Lagged Series 26                                      |                      |                      |                      | -0.0735<br>(0.0716)  | -0.0605<br>(0.0952)    |                        |                       |
| Lagged Series 6                                       |                      |                      |                      | 0.0440<br>(0.0329)   | 0.0560*<br>(0.0311)    |                        |                       |
| Lagged Series 63                                      |                      |                      |                      | 0.101***<br>(0.0270) | 0.102***<br>(0.0273)   |                        |                       |
| Lagged Series 65                                      |                      |                      |                      | -0.00680<br>(0.0187) | -0.00995<br>(0.0202)   | -0.0769<br>(0.1414)    | -0.173<br>(0.1593)    |
| Lagged Series 66                                      |                      |                      |                      | 0.0172<br>(0.0243)   | 0.00923<br>(0.0246)    | -0.0302***<br>(0.0105) | -0.0202<br>(0.0139)   |
| Lagged Series 7                                       |                      |                      |                      | -0.00341<br>(0.0466) | -0.0118<br>(0.0481)    |                        |                       |
| Lagged Tenure at Firm                                 |                      |                      |                      |                      | -0.00146**<br>(0.0007) | -0.00110<br>(0.0022)   | 0.00184<br>(0.0013)   |
| Advisor FE                                            |                      |                      |                      |                      |                        | Yes                    | Yes                   |
| Firm FE                                               |                      |                      |                      |                      |                        |                        | Yes                   |
| State × Year FE                                       |                      |                      |                      |                      |                        |                        | Yes                   |
| R <sup>2</sup>                                        | 0.209                | 0.231                | 0.233                | 0.249                | 0.258                  | 0.818                  | 0.832                 |
| Observations                                          | 9,960                | 7,666                | 7,666                | 7,482                | 7,331                  | 7,077                  | 7,048                 |

| <b>(continued)</b>                        |                     |                      |                      |                      |                       |                      |                      |
|-------------------------------------------|---------------------|----------------------|----------------------|----------------------|-----------------------|----------------------|----------------------|
|                                           | (1)                 | (2)                  | (3)                  | (4)                  | (5)                   | (6)                  | (7)                  |
| <b>Panel B: Score as Outcome Variable</b> |                     |                      |                      |                      |                       |                      |                      |
|                                           | (1)<br>Score        | (2)<br>Score         | (3)<br>Score         | (4)<br>Score         | (5)<br>Score          | (6)<br>Score         | (7)<br>Score         |
| Log(Lagged AUM)                           | 1.937**<br>(0.7351) | 2.040**<br>(0.7463)  | 2.034**<br>(0.7550)  | 2.007**<br>(0.7387)  | 1.959***<br>(0.7080)  | 1.706**<br>(0.7796)  | 2.402***<br>(0.6239) |
| Lagged Misconduct                         |                     | 2.586***<br>(0.8397) | 2.785***<br>(0.8343) | 2.327**<br>(0.9433)  | 2.503**<br>(1.0273)   | 0.940<br>(0.6559)    | 0.336<br>(0.5228)    |
| Log(Barron's Media)                       |                     |                      | 3.119**<br>(1.2579)  | 3.108**<br>(1.3468)  | 2.668**<br>(1.2917)   | -1.822**<br>(0.8223) | -2.178*<br>(1.0536)  |
| Log(Non-Barron's Media)                   |                     |                      | 1.007<br>(0.5953)    | 0.646<br>(0.6541)    | 0.563<br>(0.6626)     | -0.241<br>(0.4124)   | 0.0709<br>(0.3988)   |
| Lagged Series 24                          |                     |                      |                      | 2.957***<br>(0.8149) | 2.822***<br>(0.8432)  |                      |                      |
| Lagged Series 26                          |                     |                      |                      | 0.616<br>(1.1581)    | 0.793<br>(1.3200)     |                      |                      |
| Lagged Series 6                           |                     |                      |                      | -1.294*<br>(0.7243)  | -1.151<br>(0.7577)    |                      |                      |
| Lagged Series 63                          |                     |                      |                      | 2.151<br>(1.3833)    | 2.619*<br>(1.4689)    |                      |                      |
| Lagged Series 65                          |                     |                      |                      | 1.456**<br>(0.5441)  | 1.850***<br>(0.5942)  | -3.407**<br>(1.6460) | -6.295**<br>(3.0301) |
| Lagged Series 66                          |                     |                      |                      | -1.172<br>(1.2470)   | -0.654<br>(1.3811)    | -1.122*<br>(0.5684)  | -1.069*<br>(0.6068)  |
| Lagged Series 7                           |                     |                      |                      | -1.253*<br>(0.6866)  | -1.223<br>(0.8672)    |                      |                      |
| Lagged Tenure at Firm                     |                     |                      |                      |                      | -0.0600**<br>(0.0256) | 0.0987<br>(0.1119)   | -0.539<br>(0.3303)   |
| Advisor FE                                |                     |                      |                      |                      |                       | Yes                  | Yes                  |
| Firm FE                                   |                     |                      |                      |                      |                       |                      | Yes                  |
| State $\times$ Year FE                    |                     |                      |                      |                      |                       |                      | Yes                  |
| $R^2$                                     | 0.120               | 0.130                | 0.144                | 0.208                | 0.221                 | 0.830                | 0.879                |
| Observations                              | 834                 | 701                  | 701                  | 701                  | 700                   | 661                  | 598                  |

This table examines the predictive power of observable advisor characteristics in relation to Barron's Top 100 rankings. Panel A reports the correlations between advisor characteristics and the likelihood of being named a Top 100 advisor. Panel B reports the correlations between these characteristics and the continuous scores assigned by Barron's to advisors within the Top 100 ranking. The dependent variable in Panel A is *Top 100 Indicator*, a binary variable equal to 1 if the advisor is included in Barron's Top 100 ranking at time  $t$ , and 0 otherwise. The dependent variable in Panel B is *Score*, Barron's proprietary score assigned to advisors included in the Top 100 ranking. The unit of observation is the advisor-year, covering the period 2009–2020. Robust standard errors are shown in parentheses and clustered at the firm level. \*\*\*, \*\*, and \* denote statistical significance at the 1%, 5%, and 10% levels, respectively.

**Table IA.6 Robustness Check: Control for the Growth of AUM**

| <b>Panel A: Dependent Variable — Log(AUM)</b>      |                      |                       |                       |                       |                       |                      |
|----------------------------------------------------|----------------------|-----------------------|-----------------------|-----------------------|-----------------------|----------------------|
|                                                    | (1)                  | (2)                   | (3)                   | (4)                   | (5)                   | (6)                  |
|                                                    | Log(AUM)             | Log(AUM)              | Log(AUM)              | Log(AUM)              | Log(AUM)              | AUM                  |
| Top 100 Indicator                                  |                      |                       | 0.146***<br>(0.0298)  | 0.131***<br>(0.0307)  | 0.101***<br>(0.0331)  | 0.105**<br>(0.0446)  |
| Lagged Top 100 Indicator                           |                      |                       |                       |                       | 0.0813***<br>(0.0203) | 0.108***<br>(0.0239) |
| Normalized Rank                                    | 1.180***<br>(0.1176) | 0.201***<br>(0.0526)  | 0.185***<br>(0.0511)  | 0.188***<br>(0.0498)  | 0.183***<br>(0.0498)  | 0.102***<br>(0.0283) |
| $\Delta \text{Log(AUM)}$                           | 0.131***<br>(0.0437) | 0.0939***<br>(0.0250) | 0.0943***<br>(0.0248) | 0.0988***<br>(0.0237) | 0.101***<br>(0.0235)  | 0.123***<br>(0.0280) |
| Controls                                           |                      | Yes                   | Yes                   | Yes                   | Yes                   | Yes                  |
| Advisor FE                                         |                      | Yes                   | Yes                   | Yes                   | Yes                   | Yes                  |
| Firm FE                                            |                      |                       |                       | Yes                   | Yes                   | Yes                  |
| State $\times$ Year FE                             |                      |                       |                       | Yes                   | Yes                   | Yes                  |
| $R^2$ or Pseudo $R^2$                              | 0.129                | 0.940                 | 0.941                 | 0.953                 | 0.953                 | 0.962                |
| Observations                                       | 7,635                | 7,049                 | 7,049                 | 7,027                 | 7,027                 | 7,027                |
| <b>Panel B: Dependent Variable — Log(Accounts)</b> |                      |                       |                       |                       |                       |                      |
|                                                    | (1)                  | (2)                   | (3)                   | (4)                   | (5)                   | (6)                  |
|                                                    | Log(Accounts)        | Log(Accounts)         | Log(Accounts)         | Log(Accounts)         | Log(Accounts)         | Accounts             |
| Top 100 Indicator                                  |                      |                       | 0.0895*<br>(0.0478)   | 0.0723<br>(0.0522)    | 0.0488<br>(0.0526)    | 0.0307<br>(0.1001)   |
| Lagged Top 100 Indicator                           |                      |                       |                       |                       | 0.0627**<br>(0.0276)  | 0.190**<br>(0.0745)  |
| Normalized Rank                                    | 0.360***<br>(0.1183) | 0.0710<br>(0.0475)    | 0.0610<br>(0.0436)    | 0.0642<br>(0.0589)    | 0.0600<br>(0.0590)    | 0.0223<br>(0.0794)   |
| $\Delta \text{Log(Accounts)}$                      | 0.251***<br>(0.0344) | 0.109***<br>(0.0173)  | 0.109***<br>(0.0172)  | 0.106***<br>(0.0180)  | 0.107***<br>(0.0180)  | 0.130***<br>(0.0282) |
| Controls                                           |                      | Yes                   | Yes                   | Yes                   | Yes                   | Yes                  |
| Advisor FE                                         |                      | Yes                   | Yes                   | Yes                   | Yes                   | Yes                  |
| Firm FE                                            |                      |                       |                       | Yes                   | Yes                   | Yes                  |
| State $\times$ Year FE                             |                      |                       |                       | Yes                   | Yes                   | Yes                  |
| $R^2$ or Pseudo $R^2$                              | 0.020                | 0.911                 | 0.911                 | 0.920                 | 0.920                 | 0.919                |
| Observations                                       | 7,632                | 7,046                 | 7,046                 | 7,024                 | 7,024                 | 7,024                |

This table reports whether the effect of being named to Barron's Top 100 ranking is mechanically driven by growth in assets under management (AUM). The dependent variable in Panel A is the logarithm of AUM at time  $t + 1$ , while the dependent variable in Panel B is the logarithm of one plus the number of accounts at time  $t + 1$ . *Top 100 Indicator* is a binary variable equal to one if the advisor is included in Barron's Top 100 ranking at time  $t$ , and zero otherwise. *Normalized Rank* is a continuous, state-level measure of advisor quality.  $\Delta \text{Log(AUM)}$  captures the year-over-year growth in AUM, and  $\Delta \text{Log(Accounts)}$  captures the year-over-year growth in the number of accounts. Column (6) presents results estimated using Poisson maximum likelihood (ML), where the dependent variable is AUM in Panel A and the number of accounts in Panel B. All specifications include controls for advisor experience and exam qualifications, including Series 6, 7, 24, 65, and 66 license dummies. Standard errors are clustered at the firm level. \*\*\*, \*\*, and \* denote statistical significance at the 1%, 5%, and 10% levels, respectively.

Table IA.7 Robustness Check: Year-to-Year Changes in AUM or Number of Accounts

| <b>Panel A: Dependent Variable — Year-to-Year Change in AUM</b>                |                        |                        |                        |                        |                        |
|--------------------------------------------------------------------------------|------------------------|------------------------|------------------------|------------------------|------------------------|
|                                                                                | (1)                    | (2)                    | (3)                    | (4)                    | (5)                    |
|                                                                                | $\Delta$ AUM           |
| Top 100 Indicator                                                              |                        |                        | 0.0274***<br>(0.0102)  | 0.0290**<br>(0.0116)   | 0.0233<br>(0.0198)     |
| Lagged Top 100 Indicator                                                       |                        |                        |                        |                        | 0.0137<br>(0.0123)     |
| Normalized Rank                                                                | -0.0239***<br>(0.0058) | -0.0244***<br>(0.0054) | -0.0360***<br>(0.0060) | -0.0411***<br>(0.0084) | -0.0334***<br>(0.0068) |
| Controls                                                                       |                        | Yes                    | Yes                    | Yes                    | Yes                    |
| Firm FE                                                                        |                        |                        |                        | Yes                    | Yes                    |
| State $\times$ Year FE                                                         |                        |                        |                        | Yes                    | Yes                    |
| $R^2$                                                                          | 0.001                  | 0.007                  | 0.008                  | 0.119                  | 0.125                  |
| Observations                                                                   | 9,696                  | 9,229                  | 9,229                  | 9,214                  | 7,130                  |
| <b>Panel B: Dependent Variable — Year-to-Year Change in Number of Accounts</b> |                        |                        |                        |                        |                        |
|                                                                                | (1)                    | (2)                    | (3)                    | (4)                    | (5)                    |
|                                                                                | $\Delta$ Accounts      |
| Top 100 Indicator                                                              |                        |                        | 0.0438**<br>(0.0217)   | 0.0425*<br>(0.0225)    | 0.0138<br>(0.0459)     |
| Lagged Top 100 Indicator                                                       |                        |                        |                        |                        | 0.0477*<br>(0.0287)    |
| Normalized Rank                                                                | -0.00648<br>(0.0087)   | -0.0107<br>(0.0082)    | -0.0293***<br>(0.0083) | -0.0305***<br>(0.0095) | -0.0367***<br>(0.0071) |
| Controls                                                                       |                        | Yes                    | Yes                    | Yes                    | Yes                    |
| Firm FE                                                                        |                        |                        |                        | Yes                    | Yes                    |
| State $\times$ Year FE                                                         |                        |                        |                        | Yes                    | Yes                    |
| $R^2$                                                                          | 0.000                  | 0.001                  | 0.002                  | 0.082                  | 0.088                  |
| Observations                                                                   | 9,695                  | 9,230                  | 9,230                  | 9,212                  | 7,143                  |

This table reports regression results based on a panel of individual financial advisors from 2009 to 2020. The dependent variable in Panel A is the year-over-year change in assets under management (AUM), while in Panel B it is the year-over-year change in the number of accounts. The variable *Top 100 Indicator* is a binary variable equal to one if an advisor appears in Barron's Top 100 Ranking in year  $t$ . *Normalized Rank* is a continuous measure ranging from zero to one that captures advisor quality at the state level. All specifications include controls for advisor experience and exam qualifications, including Series 6, 7, 24, 65, and 66 license dummies. The dependent variable is winsorized at the 1% level to mitigate the influence of outliers. Observations are at the advisor-year level, and standard errors are clustered at the firm level. \*, \*\*, and \*\*\* denote statistical significance at the 10%, 5%, and 1% levels, respectively.

**Table IA.8 Individual-Level Panel Regressions (Stacked Sample)**

| <b>Panel A: Dependent Variable — Log(AUM)</b>                |                      |                      |                      |                      |                      |                      |
|--------------------------------------------------------------|----------------------|----------------------|----------------------|----------------------|----------------------|----------------------|
|                                                              | (1)                  | (2)                  | (3)                  | (4)                  | (5)                  | (6)                  |
|                                                              | Log(AUM)             | Log(AUM)             | Log(AUM)             | Log(AUM)             | Log(AUM)             | AUM                  |
| First-Time Treated                                           |                      |                      | 0.260***<br>(0.0504) | 0.126***<br>(0.0423) | 0.0869*<br>(0.0473)  | 0.179***<br>(0.0674) |
| Lagged First-Time Treated                                    |                      |                      |                      |                      | 0.0714**<br>(0.0340) |                      |
| Normalized Rank                                              | 0.603***<br>(0.0550) | 0.162***<br>(0.0424) | 0.161***<br>(0.0421) | 0.198***<br>(0.0372) | 0.194***<br>(0.0577) | 0.164***<br>(0.0385) |
| Controls                                                     |                      | Yes                  | Yes                  | Yes                  | Yes                  | Yes                  |
| Advisor × Cohort FE                                          |                      | Yes                  | Yes                  | Yes                  | Yes                  | Yes                  |
| Firm × Cohort FE                                             |                      |                      |                      | Yes                  | Yes                  | Yes                  |
| State × Year × Cohort FE                                     |                      |                      |                      | Yes                  | Yes                  | Yes                  |
| $R^2$ or Pseudo $R^2$                                        | 0.040                | 0.917                | 0.917                | 0.942                | 0.942                | 0.955                |
| Observations                                                 | 100,496              | 91,242               | 91,242               | 91,116               | 69,100               | 91,116               |
| <b>Panel B: Dependent Variable — Log(Number of Accounts)</b> |                      |                      |                      |                      |                      |                      |
|                                                              | (1)                  | (2)                  | (3)                  | (4)                  | (5)                  | (6)                  |
|                                                              | Log(Accounts)        | Log(Accounts)        | Log(Accounts)        | Log(Accounts)        | Log(Accounts)        | Accounts             |
| First-Time Treated                                           |                      |                      | 0.0690<br>(0.0650)   | 0.0552<br>(0.0647)   | 0.0213<br>(0.0962)   | 0.0412<br>(0.1350)   |
| Lagged First-Time Treated                                    |                      |                      |                      |                      | 0.00666<br>(0.0796)  |                      |
| Normalized Rank                                              | 0.285***<br>(0.0723) | 0.0761**<br>(0.0351) | 0.0757**<br>(0.0351) | 0.0629<br>(0.0409)   | 0.0842<br>(0.0567)   | 0.0143<br>(0.0496)   |
| Controls                                                     |                      | Yes                  | Yes                  | Yes                  | Yes                  | Yes                  |
| Advisor × Cohort FE                                          |                      | Yes                  | Yes                  | Yes                  | Yes                  | Yes                  |
| Firm × Cohort FE                                             |                      |                      |                      | Yes                  | Yes                  | Yes                  |
| State × Year × Cohort FE                                     |                      |                      |                      | Yes                  | Yes                  | Yes                  |
| $R^2$ or Pseudo- $R^2$                                       | 0.006                | 0.899                | 0.889                | 0.912                | 0.926                | 0.903                |
| Observations                                                 | 100,495              | 91,241               | 91,241               | 91,115               | 69,099               | 91,115               |

This table reports individual-level panel regressions using a stacked sample of financial advisors following Baker et al. (2022). All fixed effects are interacted with treatment cohorts: Advisor × Cohort FE in columns 2-6, Firm × Cohort FE in columns 4-6, and State × Year × Cohort FE in columns 4-6. Panel A presents results where the dependent variable is the logarithm of assets under management (AUM), while Panel B uses the logarithm of one plus the number of accounts as the dependent variable. *First-Time Treated* is a binary indicator equal to one in the first year an advisor appears in the Barron's Top 100 Ranking. *Normalized Rank* is a continuous variable scaled between 0 and 1, capturing an advisor's relative quality within their state. Column (6) presents results estimated using Poisson maximum likelihood (ML), where the dependent variable is AUM in Panel A and the number of accounts in Panel B. All specifications include controls for advisor experience and exam qualifications, including Series 6, 7, 24, 65, and 66 license dummies. Standard errors are clustered at the firm level. \*, \*\*, and \*\*\* denote statistical significance at the 10%, 5%, and 1% levels, respectively.

**Table IA.9 Placebo Tests for Alternative Cutoffs within Top 100**

|                         | (1)                   | (2)                   | (3)                   | (4)                   | (5)                | (6)                   |
|-------------------------|-----------------------|-----------------------|-----------------------|-----------------------|--------------------|-----------------------|
|                         | 25th                  | 25th                  | 50th                  | 50th                  | 75th               | 75th                  |
| Above Cutoff Indicator  | 0.0314<br>(0.1040)    | 0.0258<br>(0.0990)    | 0.0698<br>(0.0842)    | 0.0870<br>(0.0816)    | 0.111<br>(0.0999)  | -0.0482<br>(0.0983)   |
| Barron's Score          | 0.0686***<br>(0.0139) | 0.0701***<br>(0.0202) | 0.0480***<br>(0.0072) | 0.0624***<br>(0.0123) | 0.0194<br>(0.0342) | 0.357***<br>(0.0643)  |
| Cutoff × Barron's Score |                       | -0.00803<br>(0.0264)  |                       | -0.0210<br>(0.0145)   |                    | -0.402***<br>(0.0705) |
| Controls                |                       | Yes                   |                       | Yes                   |                    | Yes                   |
| $R^2$                   | 0.109                 | 0.156                 | 0.118                 | 0.164                 | 0.007              | 0.126                 |
| Observations            | 633                   | 631                   | 1,229                 | 1,226                 | 609                | 608                   |

This table reports the results from placebo tests using arbitrary thresholds within the Barron's Top 100 ranking. Since rankings are only available for advisors included in the Top 100, the analysis is restricted to this subset. We implement three placebo thresholds corresponding to the 25<sup>th</sup>, 50<sup>th</sup>, and 75<sup>th</sup> percentiles of the Top 100 rankings. The dependent variable is the logarithm of assets under management (AUM) in year  $t + 1$ , measured after the publication of the rankings. *Above Cutoff Indicator* is a binary variable equal to one if the advisor's rank is above the placebo threshold and zero otherwise. *Controls* include advisor experience and exam indicators (Series 6, 7, 24, 65, and 66). The unit of observation is the advisor-year, covering the period from 2004 to 2020. Robust standard errors clustered by the running variable are reported in parentheses. \*\*\*, \*\*, and \* denote statistical significance at the 1%, 5%, and 10% levels, respectively.

**Table IA.10 Individual Level Panel Regressions Controlling for Media Coverage Measured by Barron's and Non-Barron's Articles**

| <b>Panel A: Dependent Variable — Log(AUM)</b>                |                      |                       |                       |                       |                       |                      |
|--------------------------------------------------------------|----------------------|-----------------------|-----------------------|-----------------------|-----------------------|----------------------|
|                                                              | (1)                  | (2)                   | (3)                   | (4)                   | (5)                   | (6)                  |
|                                                              | Log(AUM)             | Log(AUM)              | Log(AUM)              | Log(AUM)              | Log(AUM)              | AUM                  |
| Top 100 Indicator                                            |                      |                       | 0.168***<br>(0.0241)  | 0.131***<br>(0.0308)  | 0.102***<br>(0.0322)  | 0.141***<br>(0.0440) |
| Lagged Top 100 Indicator                                     |                      |                       |                       |                       | 0.0735***<br>(0.0196) |                      |
| Log(Barron's media coverage)                                 |                      | 0.104***<br>(0.0229)  | 0.103***<br>(0.0221)  | 0.0406<br>(0.0257)    | 0.0418<br>(0.0263)    | 0.0323**<br>(0.0162) |
| Log(Non-Barron's media coverage)                             |                      | 0.0342<br>(0.0268)    | 0.0341<br>(0.0270)    | 0.0139<br>(0.0175)    | 0.0107<br>(0.0183)    | 0.00528<br>(0.0115)  |
| Normalized Rank                                              | 1.119***<br>(0.1006) | 0.205***<br>(0.0395)  | 0.188***<br>(0.0380)  | 0.216***<br>(0.0347)  | 0.204***<br>(0.0506)  | 0.181***<br>(0.0256) |
| Controls                                                     |                      | Yes                   | Yes                   | Yes                   | Yes                   | Yes                  |
| Advisor FE                                                   |                      | Yes                   | Yes                   | Yes                   | Yes                   | Yes                  |
| Firm FE                                                      |                      |                       |                       | Yes                   | Yes                   | Yes                  |
| State × Year FE                                              |                      |                       |                       | Yes                   | Yes                   | Yes                  |
| $R^2$ or Pseudo $R^2$                                        | 0.119                | 0.929                 | 0.930                 | 0.951                 | 0.953                 | 0.958                |
| Observations                                                 | 9,889                | 9,083                 | 9,083                 | 9,069                 | 7,027                 | 9,069                |
| <b>Panel B: Dependent Variable — Log(Number of Accounts)</b> |                      |                       |                       |                       |                       |                      |
|                                                              | (1)                  | (2)                   | (3)                   | (4)                   | (5)                   | (6)                  |
|                                                              | Log(Accounts)        | Log(Accounts)         | Log(Accounts)         | Log(Accounts)         | Log(Accounts)         | Accounts             |
| Top 100 Indicator                                            |                      |                       | 0.111***<br>(0.0355)  | 0.0846**<br>(0.0371)  | 0.0508<br>(0.0498)    | 0.137<br>(0.1249)    |
| Lagged Top 100 Indicator                                     |                      |                       |                       |                       | 0.0525*<br>(0.0265)   |                      |
| Log(Barron's media coverage)                                 |                      | 0.0561***<br>(0.0160) | 0.0552***<br>(0.0150) | 0.0330<br>(0.0327)    | 0.0347<br>(0.0301)    | 0.0473<br>(0.0592)   |
| Log(Non-Barron's media coverage)                             |                      | -0.00859<br>(0.0175)  | -0.00866<br>(0.0176)  | -0.000491<br>(0.0181) | 0.0108<br>(0.0206)    | -0.0794<br>(0.0597)  |
| Normalized Rank                                              | 0.321***<br>(0.1087) | 0.0995***<br>(0.0342) | 0.0881**<br>(0.0337)  | 0.0829**<br>(0.0415)  | 0.0800<br>(0.0575)    | 0.0869<br>(0.0579)   |
| Controls                                                     |                      | Yes                   | Yes                   | Yes                   | Yes                   | Yes                  |
| Advisor FE                                                   |                      | Yes                   | Yes                   | Yes                   | Yes                   | Yes                  |
| Firm FE                                                      |                      |                       |                       | Yes                   | Yes                   | Yes                  |
| State × Year FE                                              |                      |                       |                       | Yes                   | Yes                   | Yes                  |
| $R^2$ or Pseudo $R^2$                                        | 0.008                | 0.893                 | 0.893                 | 0.906                 | 0.919                 | 0.905                |
| Observations                                                 | 9,888                | 9,082                 | 9,082                 | 9,068                 | 7,026                 | 9,068                |

This table reports regression results using the panel of individual financial advisors. In Panel A, the dependent variable is the logarithm of assets under management (AUM) in year  $t + 1$ . In Panel B, the dependent variable is the logarithm of one plus the number of accounts in year  $t + 1$ . *Log(Barron's Media Coverage)* refers to the logarithm of one plus the number of Barron's articles mentioning the advisor in LexisNexis in year  $t + 1$ , while *Log(Non-Barron's Media Coverage)* is defined similarly for all non-Barron's articles. *Top 100 Indicator* is a binary variable equal to one if the advisor appears in Barron's Top 100 ranking in year  $t$ . *Normalized Rank* is a continuous measure of advisor quality based on their ranking. Column (6) presents results estimated using Poisson maximum likelihood (ML), where the dependent variable is AUM in Panel A and the number of accounts in Panel B. *Controls* include advisor experience and exam indicators (Series 6, 7, 24, 65, and 66). Standard errors are clustered at the firm level. \*, \*\*, and \*\*\* denote statistical significance at the 10%, 5%, and 1% levels, respectively.
